# Supplementary material for: Circulating Concentrations of Vitamin B6 and Kidney Cancer Prognosis: A Prospective Case-Cohort Study
Source: PubMed Central journal article supplement (PMC4623509; doi:10.1371/journal.pone.0140677), 2015-10-27
Supplement: pone.0140677.s002.pdf [file pone.0140677.s002.pdf]

Supplementary Table 2: Hazard ratios<sup>†</sup> (HR) [95% confidence intervals (CI)] for risk of all cause and cause specific mortality by categories of circulating vitamin B6 concentration, additionally adjusting for grade (participants with missing grade excluded).

| Cause of death | B6 group <sup>#</sup> | $N_{\text{deaths}}$ | HR   | [95% CI]     | $p^*$ | $p_{\text{het}}^{\S}$ |
|----------------|-----------------------|---------------------|------|--------------|-------|-----------------------|
| all cause      | 1                     | 54                  | 1.00 |              | .026  |                       |
|                | 2                     | 34                  | 1.01 | [0.55, 1.88] |       |                       |
|                | 3                     | 20                  | 0.68 | [0.32, 1.43] |       |                       |
|                | 4                     | 18                  | 0.50 | [0.23, 1.08] |       |                       |
| RCC            | 1                     | 45                  | 1.00 |              |       | .062                  |
|                | 2                     | 24                  | 0.89 | [0.46, 1.73] |       |                       |
|                | 3                     | 10                  | 0.41 | [0.17, 1.00] |       |                       |
|                | 4                     | 9                   | 0.31 | [0.12, 0.79] |       |                       |
| non-RCC        | 1                     | 9                   | 1.00 |              |       |                       |
|                | 2                     | 10                  | 1.60 | [0.56, 4.58] |       |                       |
|                | 3                     | 10                  | 1.91 | [0.65, 5.66] |       |                       |
|                | 4                     | 9                   | 1.38 | [0.44, 4.36] |       |                       |

<sup>#</sup>Groups were defined as follows: 1 [2.6, 19.8), 2 [19.8, 32.7], 3 [32.7, 49.4), 4 [49.4, 467.5] nmol/L

<sup>†</sup>Stratified by country, and adjusted for stage, age at recruitment, sex, BMI (kg/m<sup>2</sup>), smoking status, cigarettes per day, alcohol drinking status, ethanol intake per day (mL), and grade (with participants with missing grade excluded).

\* $p$ -values for the all cause models are from tests against the null hypothesis that the vitamin B6 coefficients are identically 0 (test with 3 degrees of freedom).

<sup>§</sup> $p_{\text{het}}$ -values for the competing risks model are from tests against the null hypothesis of no heterogeneity of the coefficients by cause of death (RCC versus non-RCC, test with 3 degrees of freedom).
