# Supplementary material for: Circulating Concentrations of Vitamin B6 and Kidney Cancer Prognosis: A Prospective Case-Cohort Study
Source: PubMed Central journal article supplement (PMC4623509; doi:10.1371/journal.pone.0140677), 2015-10-27
Supplement: pone.0140677.s003.pdf [file pone.0140677.s003.pdf]

Supplementary Table 3: Hazard ratios<sup>†</sup> (HR) [95% confidence intervals (CI)] for risk of all cause and cause specific mortality by categories of circulating vitamin B6 concentration, additionally adjusting for receipt of secondary treatment.

| Cause of death | B6 group <sup>#</sup> | $N_{\text{deaths}}$ | HR   | [95% CI]     | $p^*$   | $p_{\text{het}}^{\S}$ |
|----------------|-----------------------|---------------------|------|--------------|---------|-----------------------|
| all cause      | 1                     | 100                 | 1.00 |              | .000056 |                       |
|                | 2                     | 51                  | 0.75 | [0.45, 1.23] |         |                       |
|                | 3                     | 30                  | 0.47 | [0.27, 0.85] |         |                       |
|                | 4                     | 20                  | 0.34 | [0.18, 0.63] |         |                       |
| RCC            | 1                     | 45                  | 1.00 |              |         | .016                  |
|                | 2                     | 24                  | 0.70 | [0.41, 1.19] |         |                       |
|                | 3                     | 10                  | 0.30 | [0.15, 0.58] |         |                       |
|                | 4                     | 9                   | 0.24 | [0.11, 0.50] |         |                       |
| non-RCC        | 1                     | 9                   | 1.00 |              |         |                       |
|                | 2                     | 10                  | 1.05 | [0.44, 2.51] |         |                       |
|                | 3                     | 10                  | 1.39 | [0.59, 3.31] |         |                       |
|                | 4                     | 9                   | 0.85 | [0.31, 2.31] |         |                       |

<sup>#</sup>Groups were defined as follows: 1 [2.6, 19.8), 2 [19.8, 32.7], 3 [32.7, 49.4), 4 [49.4, 467.5] nmol/L

<sup>†</sup>Stratified by country, and adjusted for stage, age at recruitment, sex, BMI (kg/m<sup>2</sup>), smoking status, cigarettes per day, alcohol drinking status, ethanol intake per day (mL), and receipt of secondary treatment.

\* $p$ -values for the all cause models are from tests against the null hypothesis that the vitamin B6 coefficients are identically 0 (test with 3 degrees of freedom).

<sup>§</sup> $p_{\text{het}}$ -values for the competing risks model are from tests against the null hypothesis of no heterogeneity of the coefficients by cause of death (RCC versus non-RCC, test with 3 degrees of freedom).
