# Supplementary material for: Circulating Concentrations of Vitamin B6 and Kidney Cancer Prognosis: A Prospective Case-Cohort Study
Source: PubMed Central journal article supplement (PMC4623509; doi:10.1371/journal.pone.0140677), 2015-10-27
Supplement: pone.0140677.s004.pdf [file pone.0140677.s004.pdf]

Supplementary Table 4: Demographic and clinical characteristics of the participants for those included and not included in the case-cohort sample

|                            |                  | Included in study |       |     |       |
|----------------------------|------------------|-------------------|-------|-----|-------|
|                            |                  | No                |       | Yes |       |
|                            |                  | n                 | (%)   | n   | (%)   |
|                            | Total            | 1575              | (100) | 630 | (100) |
| Sex                        | Male             | 968               | ( 61) | 397 | ( 63) |
|                            | Female           | 607               | ( 39) | 233 | ( 37) |
| Age at recruitment (years) | [17,6,55)        | 493               | ( 31) | 155 | ( 25) |
|                            | [55,65)          | 584               | ( 37) | 249 | ( 40) |
|                            | [65,86,8]        | 497               | ( 32) | 226 | ( 36) |
|                            | missing          | 1                 | ( 0)  | 0   | ( 0)  |
| Country                    | Czech            | 568               | ( 36) | 325 | ( 52) |
|                            | Romani           | 144               | ( 9)  | 272 | ( 43) |
|                            | Russia           | 797               | ( 51) | 33  | ( 5)  |
|                            | Serbia           | 66                | ( 4)  | 0   | ( 0)  |
| BMI (kg/m <sup>2</sup> )   | [14,9,25)        | 386               | ( 25) | 168 | ( 27) |
|                            | [25,30)          | 601               | ( 38) | 266 | ( 42) |
|                            | [30,62,9]        | 582               | ( 37) | 193 | ( 31) |
|                            | missing          | 6                 | ( 0)  | 3   | ( 0)  |
| Smoking                    | Never smoker     | 842               | ( 53) | 305 | ( 48) |
|                            | Former smoker    | 341               | ( 22) | 162 | ( 26) |
|                            | Current smoker   | 388               | ( 25) | 163 | ( 26) |
|                            | missing          | 4                 | ( 0)  | 0   | ( 0)  |
| Diabetes                   | Yes              | 193               | ( 12) | 104 | ( 17) |
|                            | No               | 1379              | ( 88) | 526 | ( 83) |
|                            | missing          | 3                 | ( 0)  | 0   | ( 0)  |
| Hypertension               | Yes              | 820               | ( 52) | 336 | ( 53) |
|                            | No               | 752               | ( 48) | 293 | ( 47) |
|                            | missing          | 3                 | ( 0)  | 1   | ( 0)  |
| Stage                      | I                | 718               | ( 46) | 307 | ( 49) |
|                            | II               | 132               | ( 8)  | 48  | ( 8)  |
|                            | III              | 255               | ( 16) | 110 | ( 17) |
|                            | IV               | 175               | ( 11) | 164 | ( 26) |
|                            | missing          | 295               | ( 19) | 1   | ( 0)  |
| Grade                      | 1                | 214               | ( 14) | 80  | ( 13) |
|                            | 2                | 659               | ( 42) | 226 | ( 36) |
|                            | 3                | 256               | ( 16) | 117 | ( 19) |
|                            | 4                | 37                | ( 2)  | 33  | ( 5)  |
|                            | 9                | 406               | ( 26) | 174 | ( 28) |
|                            | missing          | 3                 | ( 0)  | 0   | ( 0)  |
| Histology                  | Conventional RCC | 1260              | ( 80) | 518 | ( 82) |
|                            | Papillary RCC    | 129               | ( 8)  | 51  | ( 8)  |
|                            | Chromophobe RCC  | 54                | ( 3)  | 16  | ( 3)  |
|                            | Other            | 64                | ( 4)  | 18  | ( 3)  |
|                            | Unknown          | 65                | ( 4)  | 27  | ( 4)  |
|                            | missing          | 3                 | ( 0)  | 0   | ( 0)  |
